# Supplementary material for: The Metabolite Profiling and Microbial Community Dynamics during Pineapple By-Product Fermentation Using Co-Inoculation of Lactic Acid Bacteria and Yeast
Source: MDPI journal article supplement (doi:10.3390/fermentation9020079), 2023-01-17
Supplement: s1 [file s1]

Table S1. The enzyme-producing capacity of LA5 and SA2.

| Number | Protease activity<br>(U/mL) | Amylase activity<br>(U/mL) | SOD enzyme activity<br>(U/mL) | Lipase activity (U/mL) |
|--------|-----------------------------|----------------------------|-------------------------------|------------------------|
| LA5    | 7.54 ± 0.051                | 1.41 ± 0.008               | 43.54 ± 0.522                 | 5.73 ± 0.048           |
| SA2    | 6.93 ± 0.022                | 1.36 ± 0.006               | 43.87 ± 0.489                 | 2.98 ± 0.037           |
